# Supplementary material for: French hepatitis C care cascade: substantial impact of direct-acting antivirals, but the road to elimination is still long
Source: Springer Nature journal article supplement (doi:10.1186/s12879-020-05478-6), 2020-10-15

**Fig 1: Evolution of the estimated numbers of people (18-75 y.o/18-80 y.o): i) receiving care for chronic HCV infection according to the algorithm used (principal/alternative) (A), and ii) on antiviral treatment between 2011 and 2016 (B)**

**A**

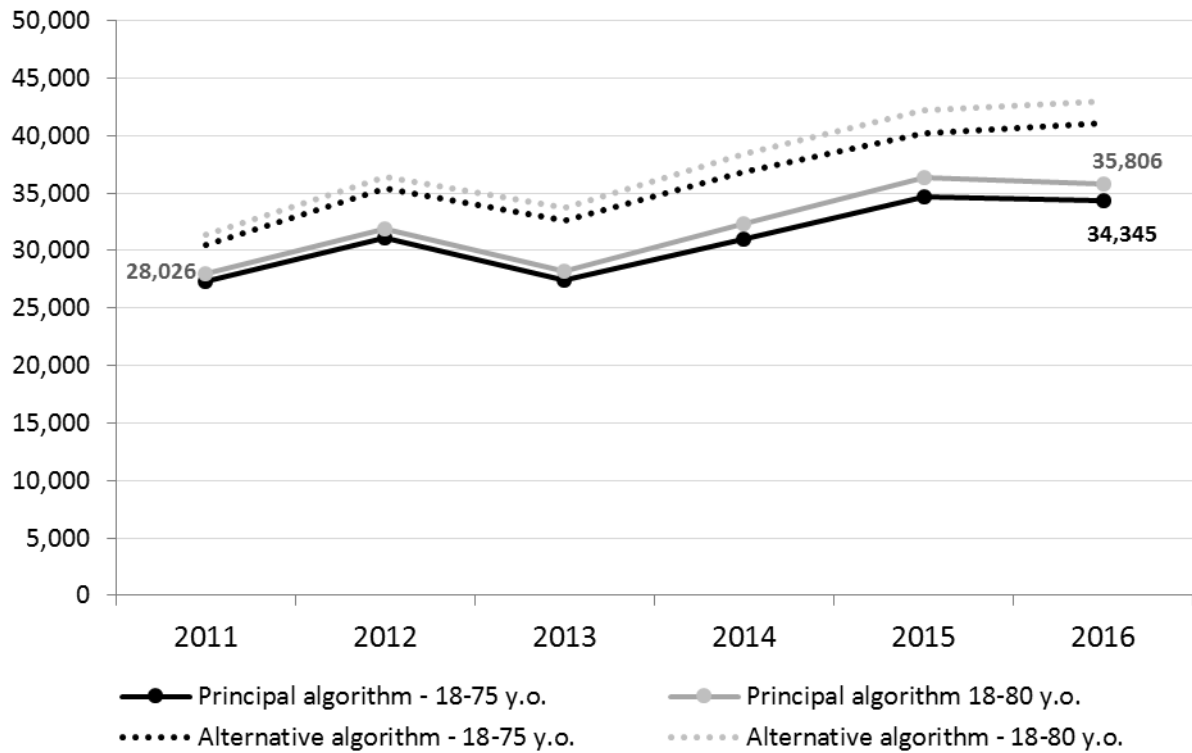

**B**

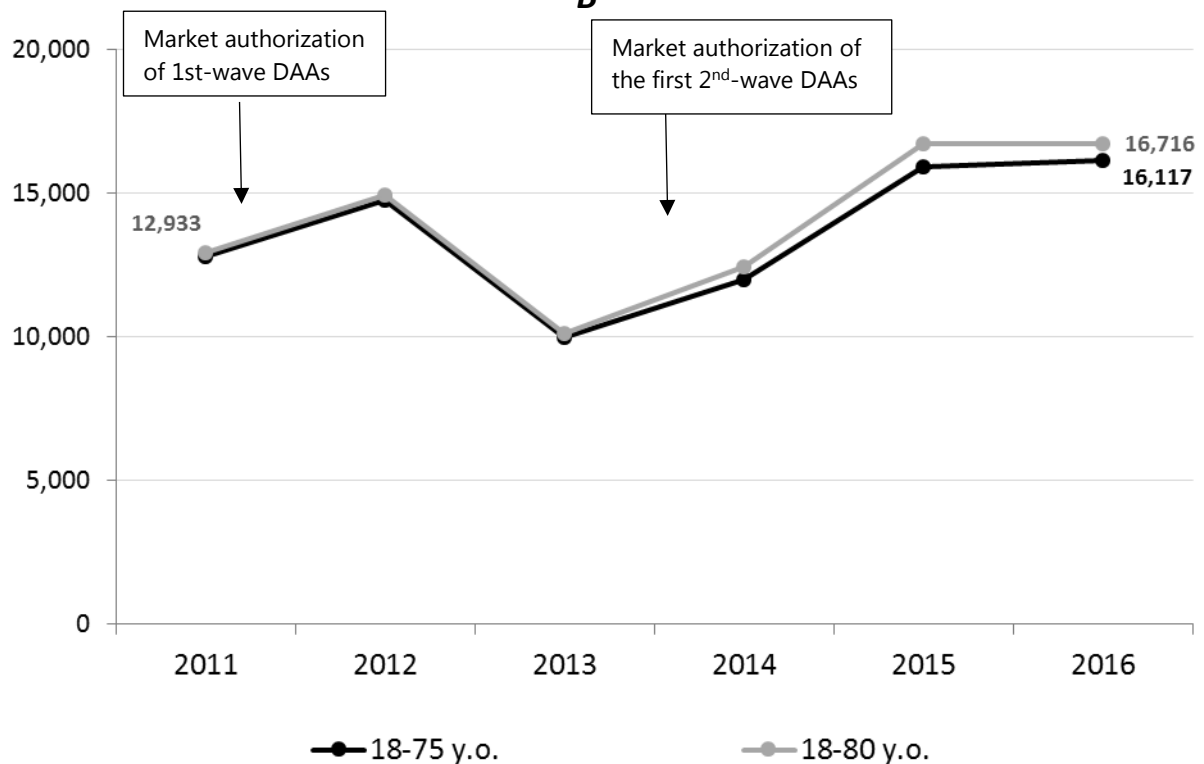

Supplement: MOESM4 [file 18487856]
